# Supplementary material for: Molecular Modeling of the Shigella flexneri Serogroup 3 and 5 O-Antigens and Conformational Relationships for a Vaccine Containing Serotypes 2a and 3a
Source: Vaccines (Basel). 2020 Nov 2;8(4):643. doi: 10.3390/vaccines8040643 (PMC7712985; doi:10.3390/vaccines8040643)
Supplement: Supplementary file 1 [file vaccines-08-00643-s001.pdf]

## Simulation Convergence

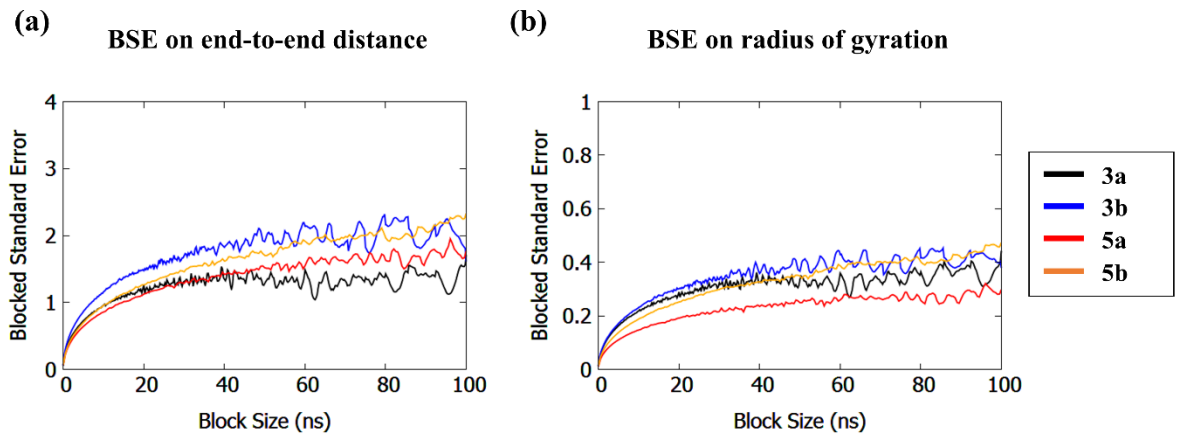

Supplementary Figure S1: Block averaging analysis for the (a) end to end distance,  $r$ , and (b) radius of gyration for 6 RUs of the serogroup 3 and 5 O-Ags. The plot of blocked standard error (BSE) versus block size reaches a plateau for all the O-Ags of serogroup 3 and 5, indicating convergence in each simulation.

|                                        | 1A_2B     | 1A_1D     | 2A_1D     | 2A_1F     | 3A_1F     | 1B_2C     | 1B_3C     | 1C_3D     | 2C_5B     | 1D_1F     |
|----------------------------------------|-----------|-----------|-----------|-----------|-----------|-----------|-----------|-----------|-----------|-----------|
| Average distance <sup>a</sup>          | 2.3 ± 0.2 | 3.9 ± 0.3 | 2.3 ± 0.2 | 2.3 ± 0.3 | 2.7 ± 0.3 | 3.7 ± 0.6 | 2.3 ± 0.2 | 2.2 ± 0.2 | 2.7 ± 0.4 | 2.8 ± 0.5 |
| r <sup>6</sup> average MD <sup>a</sup> | 2.3 ± 0.2 | 3.8 ± 0.6 | 2.2 ± 0.2 | 2.3 ± 0.2 | 2.6 ± 0.3 | 3.3 ± 0.8 | 2.2 ± 0.2 | 2.2 ± 0.1 | 2.5 ± 0.3 | 2.6 ± 0.4 |
| Theillet NMR <sup>b</sup>              | 2.2 ± 0.1 | 3.7 ± 0.4 | 2.3 ± 0.1 | 2.3 ± 0.1 | 2.4 ± 0.2 | 3.3 ± 0.4 | 2.2 ± 0.1 | 2.3 ± 0.1 | 2.7 ± 0.3 | 2.6 ± 0.2 |
| Theillet MD <sup>b</sup>               | 2.3       | 3.5       | 2.4       | 2.3       | 2.4       | 3.3       | 2.2       | 2.3       | 2.7       | 2.6       |

*Supplementary Table S1: Comparison between MD simulation and experimental data of distances between hydrogen atom pairs (columns) are in good agreement for serotype 3a. (a) The mean distance and corresponding  $r^6$  average from our 1.2  $\mu$ s production runs, excluding 200 ns for equilibration. (b) Experimental NMR distances from NOE build-up curves (estimated 10% error) of the native O-Ag and distances calculated by full ensemble relaxation analysis of 60 ns MD simulations of a 3RU serotype 3a O-Ag (Theillet et. al., 2010).*

|                                     | 1A_1B     | 1A_2B     | 1A_4B     | 1A_1D     | 1A_2D     | 2A_1B     | 2A_1D     | 2A_2D     | 2A_5D     | 2A_1G     | 4A_1D     | 5A_1B     | 5A_2B     | 1B_2C     | 1B_3C     | 1B_4C     | 2B_4C     | 2B_1G     | 3B_1G     | 3B_5G     |
|-------------------------------------|-----------|-----------|-----------|-----------|-----------|-----------|-----------|-----------|-----------|-----------|-----------|-----------|-----------|-----------|-----------|-----------|-----------|-----------|-----------|-----------|
| Average distance <sup>a</sup>       | 3.6 ± 0.6 | 2.3 ± 0.2 | 4.2 ± 0.4 | 3.6 ± 0.7 | 4.4 ± 0.3 | 5.0 ± 0.2 | 2.4 ± 0.2 | 4.3 ± 0.2 | 4.0 ± 0.4 | 4.5 ± 0.8 | 4.2 ± 0.4 | 2.6 ± 0.4 | 3.7 ± 0.5 | 4.0 ± 0.4 | 2.3 ± 0.2 | 3.9 ± 0.3 | 4.2 ± 0.3 | 2.4 ± 0.5 | 2.7 ± 0.3 | 3.0 ± 0.6 |
| r <sup>b</sup> average <sup>a</sup> | 3.2 ± 0.8 | 2.2 ± 0.2 | 4.0 ± 1.1 | 3.1 ± 0.8 | 4.3 ± 0.4 | 4.9 ± 0.2 | 2.3 ± 0.2 | 4.3 ± 0.8 | 3.9 ± 0.4 | 3.9 ± 1.4 | 4.0 ± 0.8 | 2.4 ± 0.3 | 3.4 ± 0.9 | 3.6 ± 1.5 | 2.3 ± 0.2 | 3.7 ± 1.1 | 4.1 ± 0.4 | 2.3 ± 0.2 | 2.6 ± 0.4 | 2.7 ± 0.4 |
| ROE <sup>b</sup>                    | 3.1 ± 0.3 | 2.1 ± 0.2 | 4.7 ± 0.5 |           | 4.5 ± 0.4 |           | 2.0 ± 0.2 | 4.5 ± 0.4 | 4.1 ± 0.4 | 4.1 ± 0.4 | 4.2 ± 0.4 | 2.4 ± 0.2 | 4.6 ± 0.5 | 3.4 ± 0.3 | 2.1 ± 0.2 | 4.3 ± 0.4 | 4.6 ± 0.5 | 2.3 ± 0.2 | 2.5 ± 0.2 | 3.0 ± 0.3 |
| NOE <sup>b</sup>                    | 3.0 ± 0.3 | 2.1 ± 0.2 | 4.6 ± 0.5 | 3.5 ± 0.3 |           | 4.7 ± 0.5 | 2.1 ± 0.2 | 4.5 ± 0.4 | 3.8 ± 0.4 | 4.1 ± 0.4 | 4.3 ± 0.4 | 2.6 ± 0.3 | 4.3 ± 0.4 | 2.9 ± 0.3 | 2.1 ± 0.2 | 4.4 ± 0.4 | 4.8 ± 0.5 | 2.4 ± 0.2 | 2.2 ± 0.2 |           |
| Theillet MD <sup>c</sup>            | 3.2       | 2.3       | 4.5       | 3.2       |           | 4.9       | 2.3       | 4.5       | 4.1       | 4.0       | 4.2       | 2.4       | 3.9       | 3.3       | 2.3       | 4.0       | 4.4       | 2.3       | 2.6       |           |

Supplementary Table S2: Distances of pairs of hydrogen atoms (columns) from MD simulation and experimental data for serotype 5a. (a) The average distance and corresponding r<sup>b</sup> average from our 2  $\mu$ s production runs, excluding 200 ns for equilibration. (b) Experimental NMR distances (estimated 10% error) derived from NOE build-up curves and ROESY off-resonance measurements on the native O-Ag sample with an avDP15 (Clement *et. al.*, 2003). (c) Distances calculated by full ensemble relaxation analysis of 60 ns MD simulations of a 3RU O-Ag (Theillet *et. al.*, 2010).
